# Supplementary material
Source: ML conference proceedings conference paper supplement (https://openaccess.thecvf.com/content/CVPR2022/html/Hao_Group_Contextualization_for_CVPR_2022_paper.html)
Supplement: Supplementary file 1 [file Hao_Group_Contextualization_for_CVPR_2022_supplemental.pdf]

## Appendix

This appendix details the architectures of the other calibrators in the ablation study. The results by inserting GCs on different residual stages are provided. Visualization examples of class activation maps on Something-Something V1 dataset are given. Gating weight distributions of different calibrators on Something-Something V1 and Kinetics-400 datasets are shown. More experimental results on datasets EGTEA Gaze+, Diving48 and Basketball-8&Soccer-10 are presented.

### A. Architectures of SE3D, GE3D-G/C and S3D-G

Figure 7 shows the detailed architectures of SE3D [16], GE3D-G/C [15] and S3D-G [50]. In the implementation, the calibrators are also densely inserted into the TSN and TSM backbones. We report their performances on Something-Something V1 (see ablation study).

### B. Results on different residual stages

Here, we also investigate which residual stage(s) to add the GC block in ResNet-50 using TSN as backbone. Table 6 compares both a single and multiple GC blocks added to different stages of ResNet. Overall, a GC block significantly improve the performance (19.7%) of the original TSN. Specifically, the results on the deeper Res3 and Res4 are better than those on Res1 and Res2, and the improvement reaches the highest of 45.9% on Res3. The possible explanation is that deeper layers can provide more high-level features which are precise for context modeling. But the last residual block Res4 has a small spatial size ( $7 \times 7$ ) and it limits the precision of spatial information. Moreover, densely incorporating multiple GC blocks into ResNet exhibits better performance than the single version.

| Model | Residual Blocks |      |      |      | Top1 (%) |
|-------|-----------------|------|------|------|----------|
|       | Res1            | Res2 | Res3 | Res4 |          |
| TSN   | ✓               | ✗    | ✗    | ✗    | 42.2     |
|       | ✗               | ✓    | ✗    | ✗    | 43.7     |
|       | ✗               | ✗    | ✓    | ✗    | 45.9     |
|       | ✗               | ✗    | ✗    | ✓    | 44.2     |
|       | ✓               | ✓    | ✗    | ✗    | 44.3     |
|       | ✓               | ✓    | ✓    | ✗    | 46.7     |
|       | ✓               | ✓    | ✓    | ✓    | 47.9     |

Table 6. Performance comparison of adding a single or more GC modules to different stages of ResNet-50 on Something-Something V1 dataset.

### C. Visualization

We provide some visualization examples of class activation maps using TSN with ECal-G/T/S/L and GC to clearly show the vital parts they learn. The sampled visualization

results are shown in Figure 8. In the implementation, we use 8-frame center crops as input and the Grad-CAM [35] technique to obtain the heatmaps. These videos are selected from Something-Something V1 dataset. The categories in Something-Something dataset emphasize not only the short-term interactions between objects (e.g., “Wiping something off something”, “Closing something” and “Bending something”) but also the long-range dependencies (e.g., “Pretending to do”, “Failing to do” and “Doing something so that it is to be”). Based on the visualization results, the GC-TSN, which aggregates the four context calibrators ECal-G/T/S/L in parallel, indeed yields more reasonable class activation maps than the original TSN and its variants ECal-TSNs with single-context.

### D. Gating weight distribution

We calculate the mean of channel weights for each ECal. Fig.9 shows the distributions of weights for 17 Something-Something V1 categories involving space-time dynamics and 17 Kinetics-400 categories with less motion variations. The results shows that GC can *inherently* learn the importance of ECals by assigning higher weights for ECal-L/T on Something-Something V1 and ECal-S on Kinetics-400.

### E. Results on other datasets

In the Appendix, we additionally provide the results on EGTEA Gaze+ [25], Diving48 [24] and Basketball-8&Soccer-10 [13] datasets. Particularly, the **EGTEA Gaze+** dataset offers first-person videos, containing 106 non-scripted daily activities occurred in the kitchen. The **Diving48** dataset consists of 48 unambiguous dive sequence, which requires modeling long-term temporal dynamics. The **Basketball-8&Soccer-10** datasets are composed of two datasets for sport classification: Basketball-8 with 8 group activities and Soccer-10 with 10 group activities.

**EGTEA Gaze+**. Table 7 shows the results of different methods on the first-vision EGTEA Gaze+ dataset. Similar observations as on other datasets, GC-Nets contribute significant improvements to their backbones when dealing with the short-term kitchen activities. Specifically, we observe 0.4%-6.2% performance increase among the results on the three train/validation splits. This demonstrates that our proposed GC module is generic for short-term temporal modeling.

**Diving48**. This dataset is also a “temporally-heavy” dataset. Since this newly released dataset version has been thoroughly revised for wrong labels, we re-run the backbones of TSN, TSM, GST and TDN using 16 frames (center crop) as input. Table 8 shows the performance comparison. Our GC-TDN achieves the highest of 87.6% Top-1 accuracy, which increases its backbone TDN by 3.0 percent-

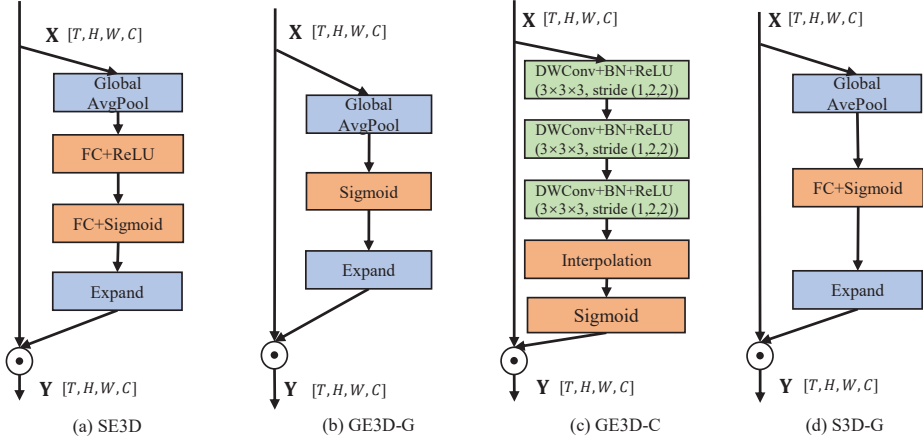

Figure 7. Illustration of architectures of SE3D, GE3D-G/C and S3D-G.

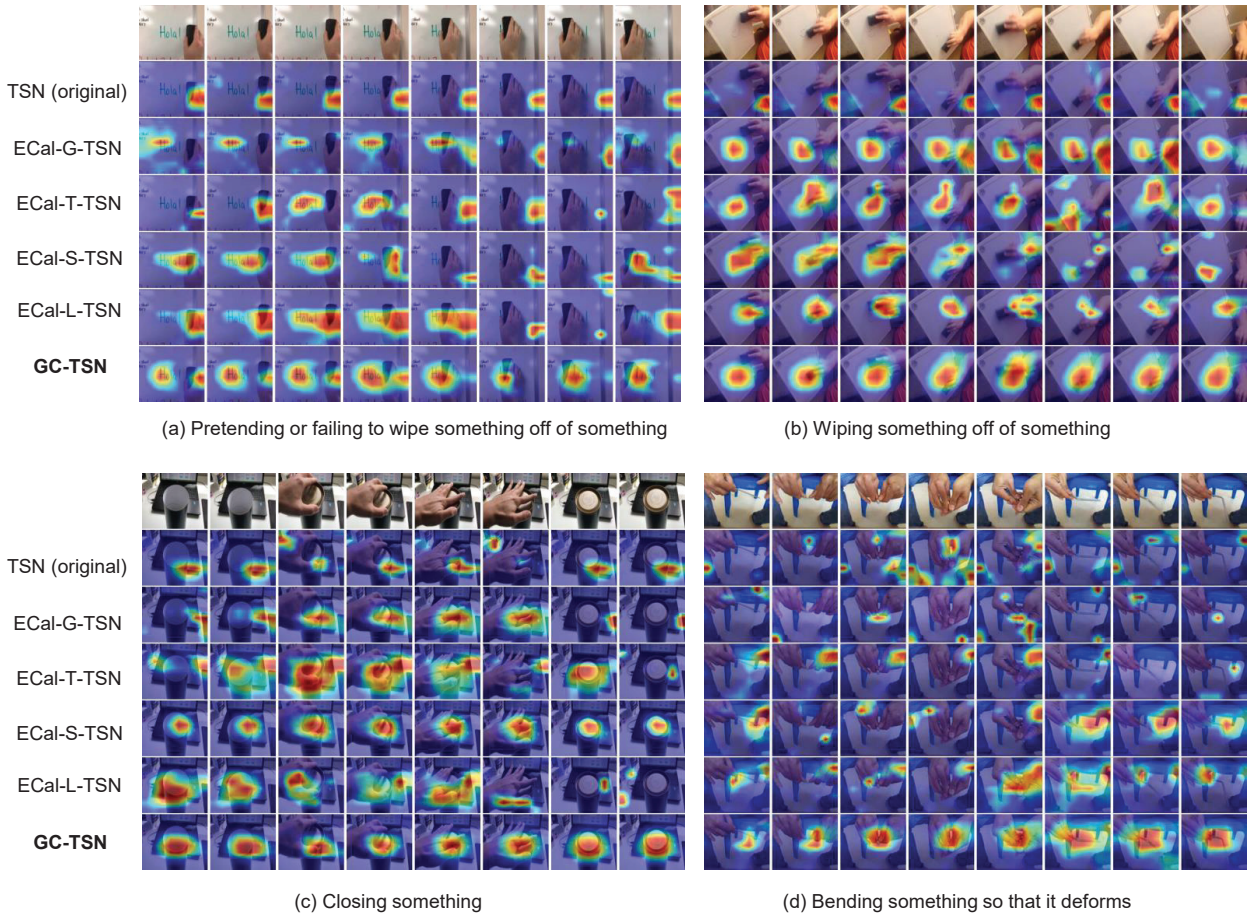

Figure 8. Visualization of class activation maps on sample video clips from the Something-Something V1 dataset. The first row presents original frames and each of the other rows presents the visualization results of a model.

age and is even better than the Transformer-based VIMPAC (85.5%).

**Basketball-8&Soccer-10.** The fine-grained sport highlights [13] take place with various local interactions among offensive players, defensive players and other objects, and

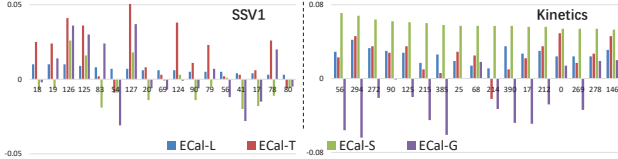

Figure 9. Means of gating weights (before Sigmoid) of ECal-L/T/S/G (GC-TSN) on Something-Something V1 and Kinetics-400. X-axis: category index.

| Method           | Backbone | #Frame | Split1      | Split2      | Split3      |
|------------------|----------|--------|-------------|-------------|-------------|
| I3D-2stream [25] | ResNet34 | 24     | 55.8        | 53.1        | 53.6        |
| R34-2stream [38] | ResNet34 | 25     | 62.2        | 61.5        | 58.6        |
| SAP [48]         | ResNet50 | 64     | 64.1        | 62.1        | 62.0        |
| TSN (our impl.)  | ResNet50 | 8      | 61.6        | 58.5        | 55.2        |
| GST (our impl.)  | ResNet50 | 8      | 63.3        | 61.2        | 59.2        |
| TSM (our impl.)  | ResNet50 | 8      | 63.5        | 62.8        | 59.5        |
| TDN (our impl.)  | ResNet50 | 8      | 63.9        | 60.8        | 60.2        |
| <b>GC-TSN</b>    | ResNet50 | 8      | 66.4        | 64.6        | 61.4        |
| <b>GC-GST</b>    | ResNet50 | 8      | 65.5        | 61.6        | 60.6        |
| <b>GC-TSM</b>    | ResNet50 | 8      | <b>66.5</b> | <b>66.1</b> | <b>62.6</b> |
| <b>GC-TDN</b>    | ResNet50 | 8      | 65.0        | 61.8        | 61.0        |

Table 7. Performance (Top-1 accuracy %) comparison on EGTEA Gaze+ dataset using the official train/validation split 1/2/3.

| Method                  | Backbone    | #Frame | Top-1       |
|-------------------------|-------------|--------|-------------|
| SlowFast, 16×8 from [2] | ResNet101   | 64+16  | 77.6        |
| TimeSformer-HR [2]      | Transformer | 16     | 78.0        |
| TimeSformer-L [2]       | Transformer | 96     | 81.0        |
| VIMPAC [39]             | Transformer | 32     | 85.5        |
| TSN (our impl.)         | ResNet50    | 16     | 79.0        |
| GST (our impl.)         | ResNet50    | 16     | 78.9        |
| TSM (our impl.)         | ResNet50    | 16     | 83.2        |
| TDN (our impl.)         | ResNet50    | 16     | 84.6        |
| <b>GC-TSN</b>           | ResNet50    | 16     | 86.8        |
| <b>GC-GST</b>           | ResNet50    | 16     | 82.5        |
| <b>GC-TSM</b>           | ResNet50    | 16     | 87.2        |
| <b>GC-TDN</b>           | ResNet50    | 16     | <b>87.6</b> |

Table 8. Performance (Top-1 accuracy %) comparison on the updated Diving48 dataset using the train/validation split v2.

| Model                | Pretrain | Basketball-8 |             | Soccer-10   |             |
|----------------------|----------|--------------|-------------|-------------|-------------|
|                      |          | Validation   | Test        | Validation  | Test        |
| I3D [3]              | ImageNet | —            | 75.4        | —           | 88.3        |
| Nonlocal-I3D [47]    | ImageNet | —            | 77.2        | —           | 88.3        |
| GST [30] (our impl.) | ImageNet | 78.8         | 75.8        | 87.9        | 87.6        |
| <b>GC-GST</b>        | ImageNet | 81.8         | 78.4        | 88.3        | 88.5        |
| TSN [56]             | ImageNet | 71.9         | 68.5        | 86.2        | 83.7        |
| <b>GC-TSN</b>        | ImageNet | 81.8         | 78.8        | 89.5        | 88.9        |
| TSM [26]             | Kinetics | 77.6         | 73.3        | 88.7        | 87.9        |
| +CBA-QSA [13]        | Kinetics | —            | 78.5        | —           | 89.3        |
| TSM-NLN [26]         | Kinetics | —            | 76.2        | —           | 88.2        |
| +CBA-QSA [13]        | Kinetics | —            | 79.5        | —           | 88.7        |
| <b>GC-TSM</b>        | Kinetics | <b>83.8</b>  | <b>80.2</b> | <b>90.3</b> | <b>89.4</b> |
| TDN [45]             | ImageNet | 80.3         | 78.4        | 86.9        | 86.1        |
| <b>GC-TDN</b>        | ImageNet | 83.0         | 79.7        | 87.7        | 87.1        |

Table 9. Comparison of performance (Top1 accuracy %) of different methods with 8 frames × 1 clip input on Sport Highlights datasets. The results of I3D, Nonlocal-I3D and TSM-NLN are cited from [13].

the local interactions could be either short-term (e.g., the “Blocked shot” highlight in Basketball) or long-term (e.g.,

the “Layup” highlight in Basketball and the “Shooting and goalkeeping” highlight in Soccer). This indicates that both the global and local axial contexts can benefit the sport activity recognition. No surprisingly, as shown in Table 9, all GC-Nets, i.e., GC-TSN, GC-GST, GC-TSM and GC-TDN, consistently boost their base networks, e.g., 68.5%→78.8% for TSN, 75.8%→78.4% for GST, 73.3%→80.2% for TSM and 78.4%→79.7% for GC-TDN. Compared to the similar feature calibration works [47] and [13], our GC module performs best with the same backbone TSM, obtaining the highest Top1 accuracy 80.2%/89.4% on Basketball-8/Soccer-10.

## F. Video annotations

Table 10 lists the selected 28 activity categories from Something-Something V1 dataset used in Figure 6.

| ID        | Name                                                                                               |
|-----------|----------------------------------------------------------------------------------------------------|
| label-1   | Approaching something with your camera                                                             |
| label-15  | Folding something                                                                                  |
| label-26  | Lifting a surface with something on it but not enough for it to slide down                         |
| label-33  | Moving away from something with your camera                                                        |
| label-37  | Moving something and something away from each other                                                |
| label-38  | Moving something and something closer to each other                                                |
| label-44  | Moving something down                                                                              |
| label-46  | Moving something up                                                                                |
| label-51  | Plugging something into something but pulling it right out as you remove your hand                 |
| label-58  | Poking something so that it falls over                                                             |
| label-61  | Pouring something into something until it overflows                                                |
| label-70  | Pretending to poke something                                                                       |
| label-73  | Pretending to put something into something                                                         |
| label-77  | Pretending to put something underneath something                                                   |
| label-78  | Pretending to scoop something up with something                                                    |
| label-81  | Pretending to squeeze something                                                                    |
| label-84  | Pretending to throw something                                                                      |
| label-88  | Pulling something from right to left                                                               |
| label-91  | Pulling two ends of something but nothing happens                                                  |
| label-106 | Putting something in front of something                                                            |
| label-112 | Putting something onto a slanted surface but it doesn't glide down                                 |
| label-118 | Putting something that cannot actually stand upright upright on the table, so it falls on its side |
| label-132 | Something being deflected from something                                                           |
| label-152 | Throwing something                                                                                 |
| label-156 | Throwing something onto a surface                                                                  |
| label-167 | Turning the camera left while filming something                                                    |
| label-168 | Turning the camera right while filming something                                                   |
| label-173 | Unfolding something                                                                                |

Table 10. Categories of the selected activities in Figure 6.
